# Supplementary material for: Neutrophil extracellular trap formation and gene programs distinguish TST/IGRA sensitization outcomes among Mycobacterium tuberculosis exposed persons living with HIV
Source: PubMed Central journal article supplement (PMC10470897; doi:10.1371/journal.pgen.1010888), 2023-08-24
Supplement: pgen.1010888.s001.pdf [file pgen.1010888.s001.pdf]

**S1 Table: Antibodies used for Flow Cytometry Analysis of Contaminating Cell Populations**

| <b>Staining step</b>                       | <b>Fluorophore</b> | <b>Specificity</b> | <b>Supplier</b>            | <b>Clone</b> | <b>Catalogue Number</b> |
|--------------------------------------------|--------------------|--------------------|----------------------------|--------------|-------------------------|
| <b>Surface Staining</b>                    | BUV496             | CD16               | BD                         | 3G8          | 612945                  |
|                                            | V450               | CD66b              | BD                         | G10F5        | 561649                  |
| <b>Staining After Perm/Wash Incubation</b> | BV650              | CD15               | BioLegend                  | W6D3         | 323034                  |
|                                            | Spark Blue 550     | CD45               | BioLegend                  | 2D1          | 368549                  |
|                                            | PE-eFluor-610      | CD14               | Thermo Fisher (Invitrogen) | 61D3         | 61-0149-42              |
|                                            | PE-Cy5             | CD3                | BD                         | UCHT1        | 561007                  |
