# Supplementary material for: Neutrophil extracellular trap formation and gene programs distinguish TST/IGRA sensitization outcomes among Mycobacterium tuberculosis exposed persons living with HIV
Source: PubMed Central journal article supplement (PMC10470897; doi:10.1371/journal.pgen.1010888), 2023-08-24
Supplement: pgen.1010888.s002.pdf [file pgen.1010888.s002.pdf]

**S2 Table: Cell population distribution of isolated PMN from HITTIN and HIT, as determined by flow cytometry**

| Characteristic                          | HITTIN <sup>a</sup> , N = 14 (3 missing values)* | HIT <sup>b</sup> , N = 10 (1 missing value)* | p-value** |
|-----------------------------------------|--------------------------------------------------|----------------------------------------------|-----------|
| CD15+ CD66b+                            | 92.70% (87.05, 93.53)                            | 94.35% (93.65, 97.08)                        | 0.02**    |
| CD16+ (Neutrophils)                     | 86.90 (80.28, 92.90)                             | 90.45 (86.10, 93.25)                         | 0.28      |
| CD16- CD14 <sub>low</sub> (Eosinophils) | 4.33 (1.51, 7.23)                                | 3.63 (2.11, 6.60)                            | 0.93      |
| CD15- CD66b-                            | 7.31% (6.44, 12.95)                              | 5.67% (2.92, 6.32)                           | 0.03**    |
| CD3- CD14- (Other)                      | 0.30 (0.17, 0.74)                                | 0.39 (0.18, 0.58)                            | 0.66      |
| CD3- CD14+ (Monocytes)                  | 0.07 (0.04, 0.12)                                | 0.11 (0.07, 0.19)                            | 0.22      |
| CD3+ (T-cells)                          | 6.70 (6.10, 12.43)                               | 4.55 (2.27, 6.00)                            | 0.02**    |

\*Median (IQR); \*\*Wilcoxon rank sum test

<sup>a</sup> HITTIN (HIV-1-infected persistently TB, tuberculin and IGRA negative), <sup>b</sup> HIT (HIV-1-infected IGRA positive tuberculin positive)
