# Supplementary material for: Neutrophil extracellular trap formation and gene programs distinguish TST/IGRA sensitization outcomes among Mycobacterium tuberculosis exposed persons living with HIV
Source: PubMed Central journal article supplement (PMC10470897; doi:10.1371/journal.pgen.1010888), 2023-08-24
Supplement: pgen.1010888.s004.pdf [file pgen.1010888.s004.pdf]

**S4 Table: Sample characteristics**

| Characteristic   | PMN <sub>HITTIN</sub> <sup>a</sup> , N = 17 <sup>*</sup> | PMN <sub>HIT</sub> <sup>b</sup> , N = 11 <sup>*</sup> | p-value <sup>**</sup> |
|------------------|----------------------------------------------------------|-------------------------------------------------------|-----------------------|
| <b>Sequencer</b> |                                                          |                                                       | 0.4                   |
| HiSeq            | 3/ 17 (18%)                                              | 4/ 11 (36%)                                           |                       |
| NovaSeq          | 14/ 17 (82%)                                             | 7/ 11 (64%)                                           |                       |

<sup>\*</sup>n/ N (%); Mean (SD) <sup>\*\*</sup>Fisher's exact test; Wilcoxon rank sum test

<sup>a</sup>PMN<sub>HITTIN</sub> (neutrophils from HIV-1-infected persistently TB, tuberculin and IGRA negative), <sup>b</sup>PMN<sub>HIT</sub> (neutrophils from HIV-1-infected IGRA positive tuberculin positive)
