# Supplementary material for: Neutrophil extracellular trap formation and gene programs distinguish TST/IGRA sensitization outcomes among Mycobacterium tuberculosis exposed persons living with HIV
Source: PubMed Central journal article supplement (PMC10470897; doi:10.1371/journal.pgen.1010888), 2023-08-24
Supplement: pgen.1010888.s008.pdf [file pgen.1010888.s008.pdf]

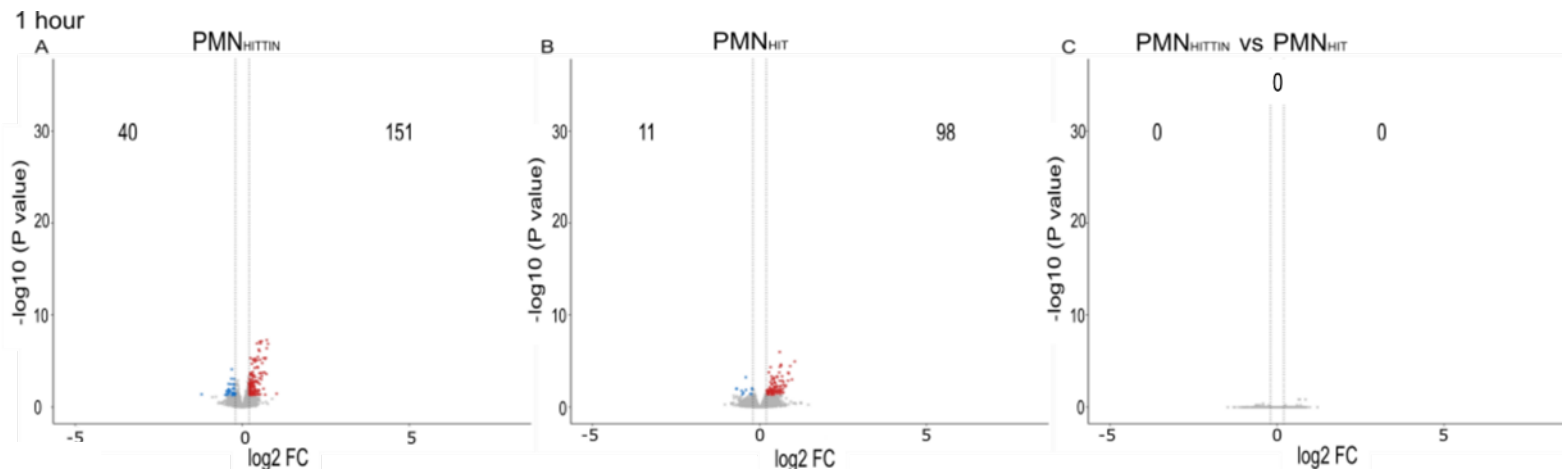

**S1 Fig: Volcano plots of differential gene expression at 1h infection by PMN from HITTING and HIT**

Volcano plot for transcriptional responses to *Mtb* challenge for neutrophils from HITTING (PMN<sub>HITTING</sub>) and HIT (PMN<sub>HIT</sub>) participants at 1h (A-C) post *Mtb* infection. The y-axis shows the negative log10 unadjusted P value and the x-axis the log<sub>2</sub> fold change (FC). The vertical dashed lines represent log<sub>2</sub> FC thresholds of -0.2 and 0.2. Each gene is represented by a dot. Genes which are downregulated or upregulated as determined by the FDR ≤ 5% are shown in blue and red, respectively. Genes with non-significant expression changes and below the log<sub>2</sub> FC threshold are shown in grey. Differentially expressed genes at 1h post-infection compared to 1h uninfected PMN from HITTING (PMN<sub>HITTING</sub>) (A) and HIT participants (PMN<sub>HIT</sub>) (B). Significant differentially triggered genes between PMN<sub>HITTING</sub> and PMN<sub>HIT</sub> at 1h post infection (C).
