# Supplementary material for: Neutrophil extracellular trap formation and gene programs distinguish TST/IGRA sensitization outcomes among Mycobacterium tuberculosis exposed persons living with HIV
Source: PubMed Central journal article supplement (PMC10470897; doi:10.1371/journal.pgen.1010888), 2023-08-24
Supplement: pgen.1010888.s009.pdf [file pgen.1010888.s009.pdf]

### DEGs from the x-axis group

### DEGs from the y-axis group

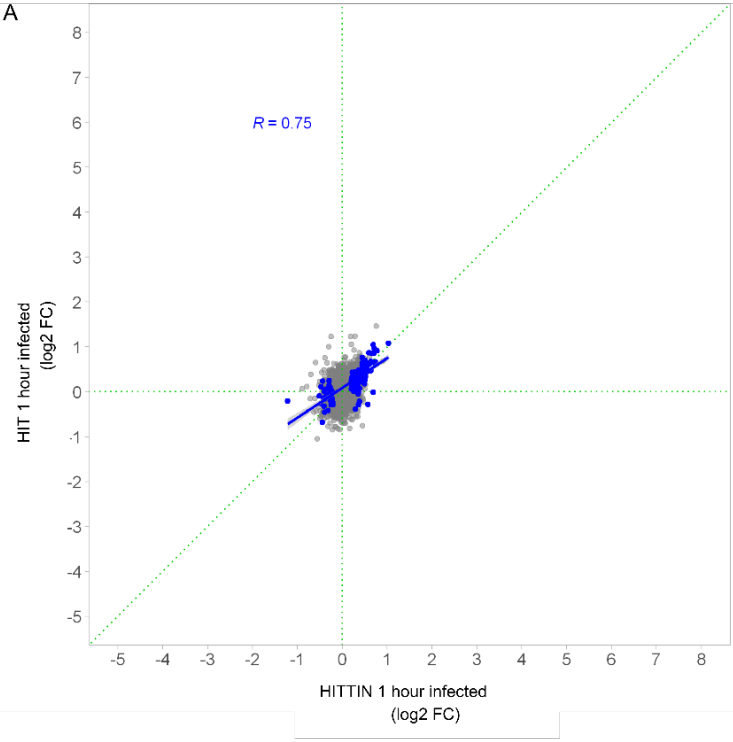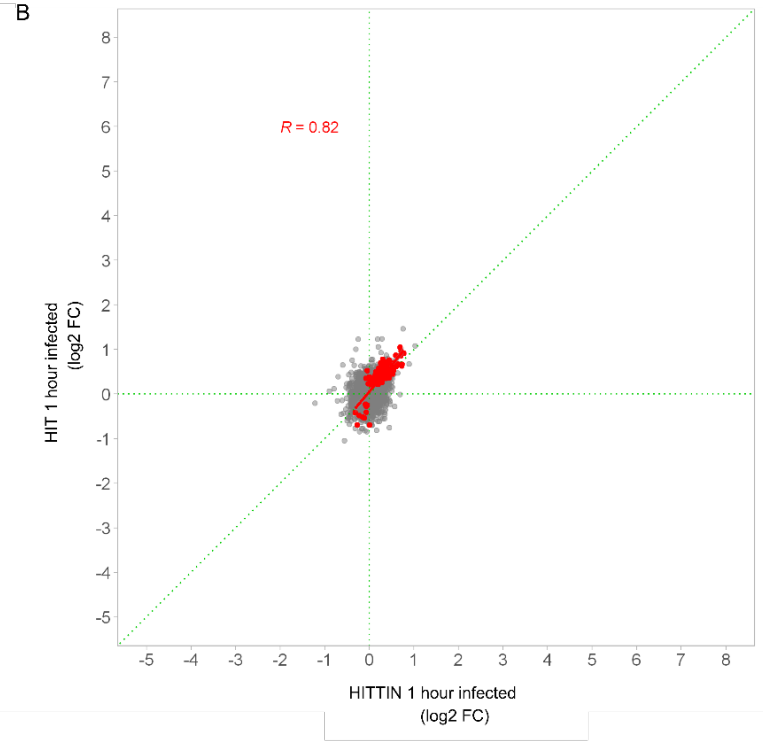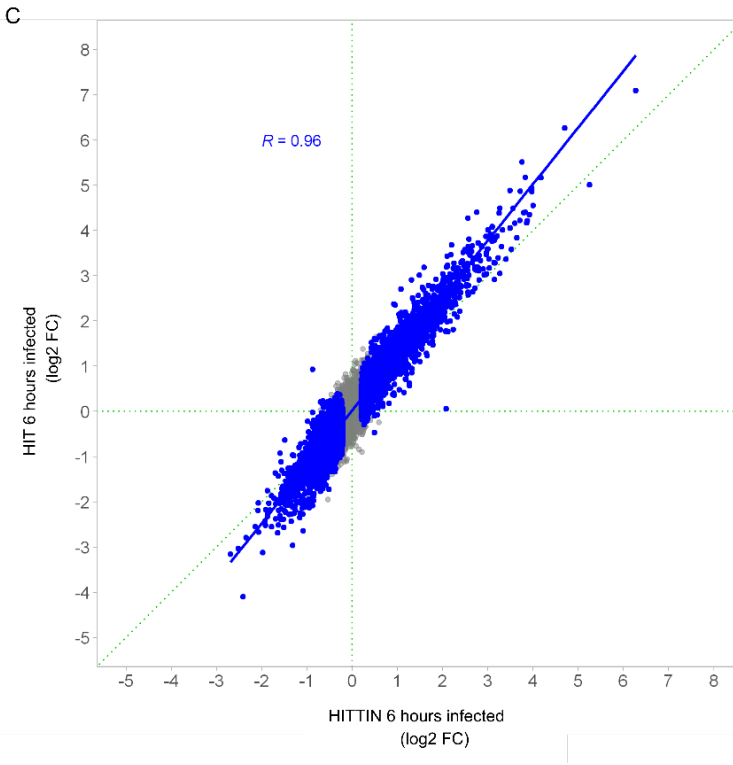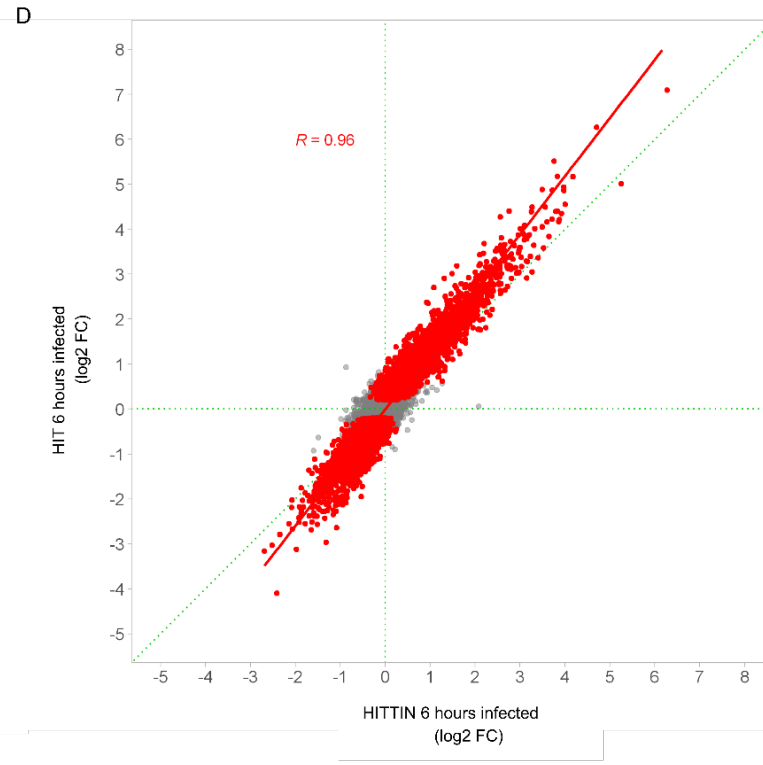

## **S2 Fig: Correlation plots of $\log_2FC$ gene expression after *Mtb* infection of PMN from HITTIN and HIT**

“HITTIN 1h infected” represents the  $\log_2FC$  gene expression effect when comparing the 1h *Mtb* infection to the 1h uninfected response in neutrophils (PMN) from HIV-1-positive persistently TB, tuberculin and IGRA negative individuals ( $PMN_{HITTIN}$ )(x-axis). “HITTIN 6h infected” is the same but for 6h. “HIT 1h infected” represents the  $\log_2FC$  gene expression effect when comparing the 1h *Mtb* infection to the 1h uninfected response in PMN from HIV-1-positive, IGRA positive, tuberculin positive individuals ( $PMN_{HIT}$ )(y-axis). “HIT 6h infected” is the same but for 6h. Scatterplots display the correlation of the  $\log_2FC$  gene expression as defined for each group at 1h (**A and B**) or 6h (**C and D**). Each grey dot represents a differentially expressed gene (DEGs). The grey dots show combined DEGs from both groups represented on the x and y axis. Blue coloured dots indicate DEGs from the x-axis group and red dots indicate the y-axis group. Pearson correlation (R value) was calculated for the coloured DEGs. The  $\log_2FC$  for each group is plotted with the y-axis as the reference group. Differential gene expression is more pronounced in genes with the highest  $\log_2FC$ , with the majority of genes displaying good correlation between phenotype groups.
