# Supplementary material for: Neutrophil extracellular trap formation and gene programs distinguish TST/IGRA sensitization outcomes among Mycobacterium tuberculosis exposed persons living with HIV
Source: PubMed Central journal article supplement (PMC10470897; doi:10.1371/journal.pgen.1010888), 2023-08-24
Supplement: pgen.1010888.s010.pdf [file pgen.1010888.s010.pdf]

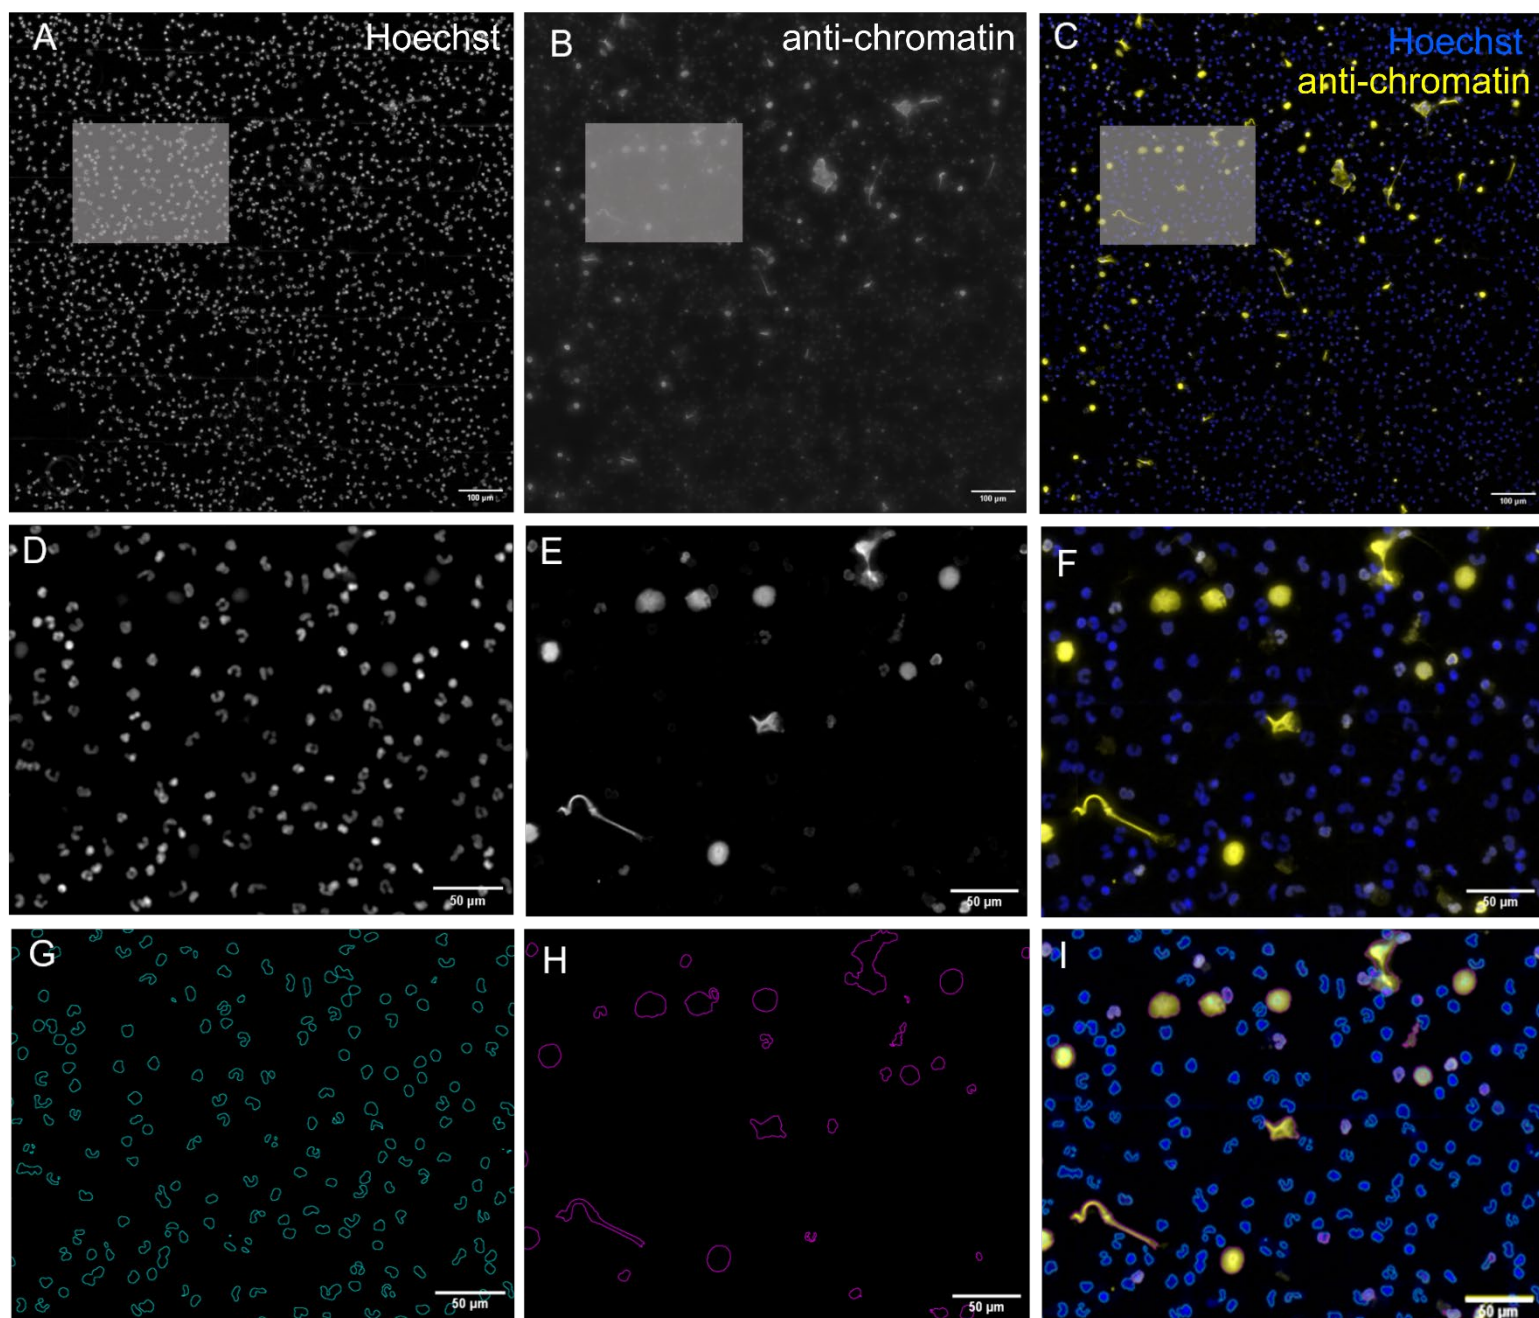

**S3 Fig: Fluorescence imaging process overview to calculate neutrophil nuclei and neutrophil extracellular trap (chromatin) area. Scale bars: 100  $\mu\text{m}$  (A-C) and 50  $\mu\text{m}$  (D-I).**

Isolated neutrophils were stimulated with *Mtb* and stained with Hoechst 33342 (A and boxed area D) and PL2-3 (B and boxed area E). C and the boxed area F show the overlap (blue, DNA; yellow, chromatin). The segmentation of fluorescent signals used to calculate the neutrophil nuclei area (G) and neutrophil extracellular trap area (H) with the overlap shown in (I). The scale bars represent 100  $\mu\text{m}$  (A-C) and 50  $\mu\text{m}$  (D-I).
