# Supplementary material for: Neutrophil extracellular trap formation and gene programs distinguish TST/IGRA sensitization outcomes among Mycobacterium tuberculosis exposed persons living with HIV
Source: PubMed Central journal article supplement (PMC10470897; doi:10.1371/journal.pgen.1010888), 2023-08-24
Supplement: pgen.1010888.s013.pdf [file pgen.1010888.s013.pdf]

**A. Raw data**

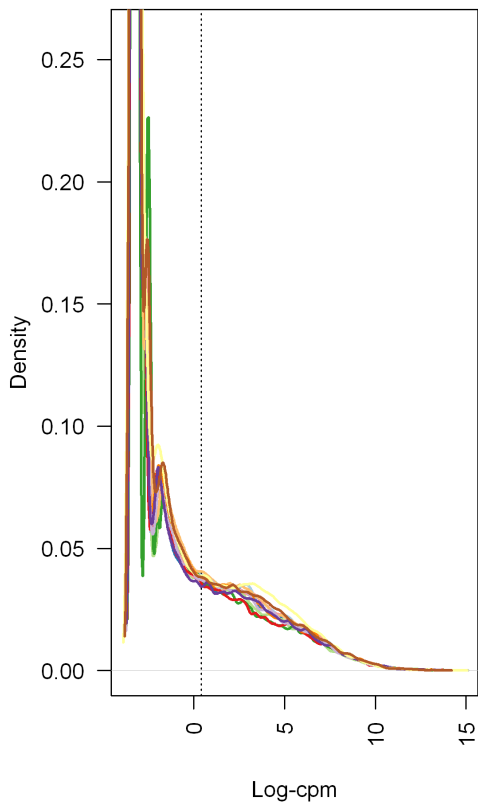

**B. Filtered data**

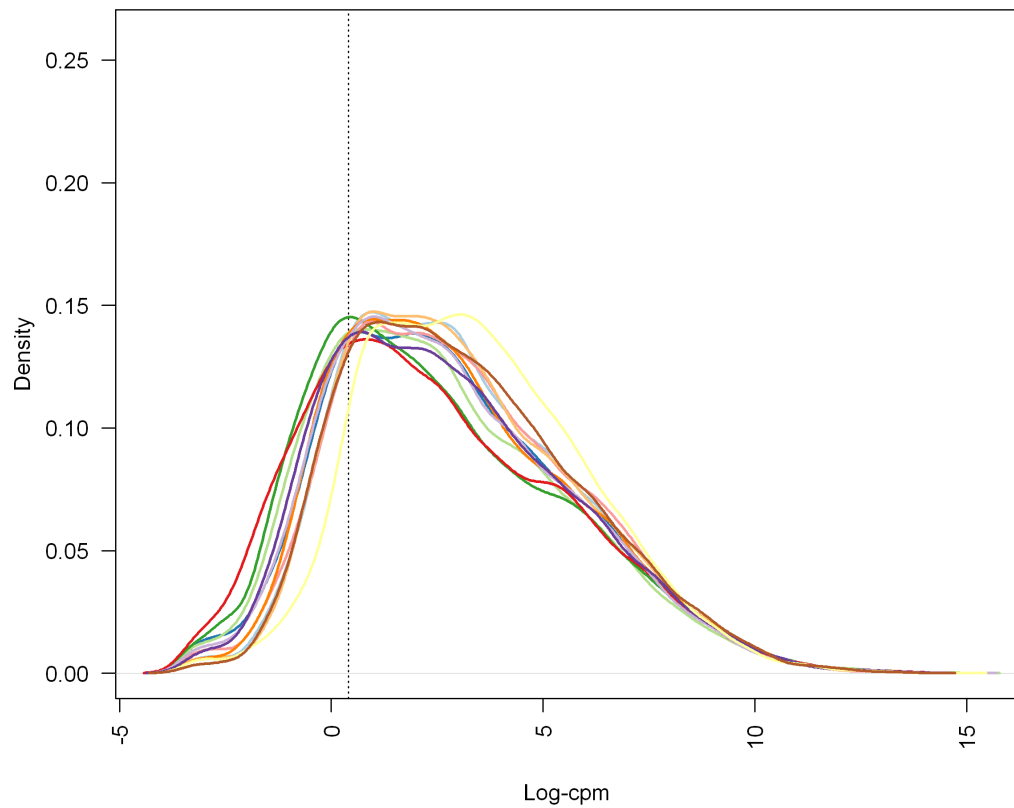

**S6 Fig: Density plot showing successful filtering applied to counts.**

Density plot with the density represented on the y-axis for the log-cpm values before **(A)** and after **(B)** filtering. The dotted vertical line is equivalent to the counts per million (CPM) threshold of 1.32 which was used in the filtering step.
